# Supplementary material for: Manipulation of Autophagy in Phagocytes Facilitates Staphylococcus aureus Bloodstream Infection
Source: PubMed Central journal article supplement (PMC4534639; doi:10.1128/iai.00358-15), 2015-08-12
Supplement: IAI.00358-15_zii999091360so1.pdf [file IAI.00358-15_zii999091360so1.pdf]

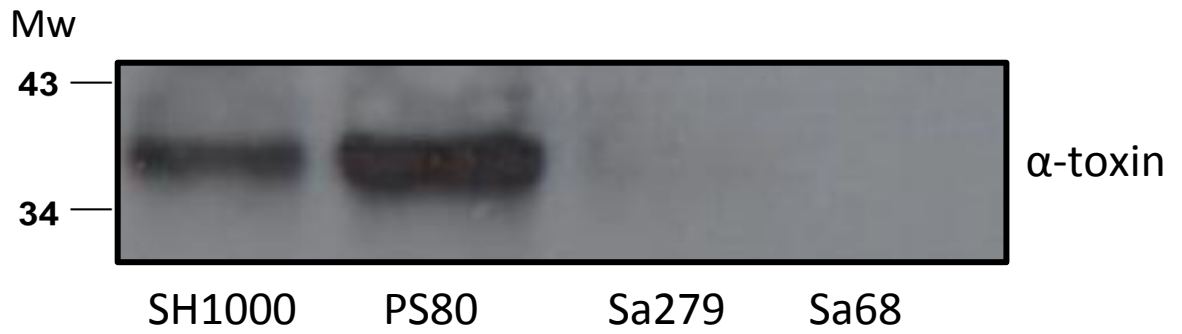

**Supplemental Figure 1: Hla expression of *S. aureus* strains**

Supernatants from stationary phase cultures were filtered, concentrated and expression of Hla assessed by Western blotting. A representative blot from 3 independent experiments is shown.
